# Supplementary material for: Use of the computer-retargeted group II intron RmInt1 of Sinorhizobium meliloti for gene targeting
Source: PubMed Central journal article supplement — RNA Biol. 2014 Mar 7;11(4):391–401. doi: 10.4161/rna.28373 (PMC4075523; doi:10.4161/rna.28373), 2014-03-07
Supplement: rna-11-391-s01.pdf [file rna-11-391-s01.pdf]

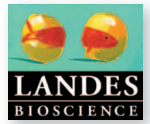

## Supplemental Material to:

Fernando M García-Rodríguez, Teresa Hernández-Gutiérrez, Vanessa Díaz-Prado, and Nicolás Toro García

Use of the computer-retargeted group II intron RmlInt1 of  
*Sinorhizobium meliloti* for gene targeting

2014; 11(4)

<http://dx.doi.org/10.4161/rna.28373>

[www.landesbioscience.com/journals/rnabiology/article/28373/](http://www.landesbioscience.com/journals/rnabiology/article/28373/)

|          |   | -20 | -19 | -18 | -17 | -16 | -15 | -14 |  |  |  |  | +2 | +3 | +4 | +5 |   |  |
|----------|---|-----|-----|-----|-----|-----|-----|-----|--|--|--|--|----|----|----|----|---|--|
| Pool     | A | 22  | 24  | 26  | 30  | 32  | 32  | 25  |  |  |  |  | 26 | 34 | 39 | 20 | A |  |
|          | C | 19  | 19  | 23  | 12  | 14  | 19  | 16  |  |  |  |  | 36 | 27 | 29 | 30 | C |  |
|          | G | 25  | 29  | 20  | 26  | 30  | 23  | 30  |  |  |  |  | 15 | 21 | 13 | 18 | G |  |
|          | T | 34  | 29  | 31  | 31  | 23  | 26  | 30  |  |  |  |  | 23 | 18 | 19 | 31 | T |  |
| Selected | A | 21  | 28  | 44  | 36  | 48  | 1   | 32  |  |  |  |  | 44 | 29 | 4  | 42 | A |  |
|          | C | 4   | 11  | 19  | 15  | 1   | 1   | 14  |  |  |  |  | 30 | 25 | 8  | 9  | C |  |
|          | G | 15  | 11  | 13  | 21  | 43  | 0   | 18  |  |  |  |  | 12 | 6  | 77 | 25 | G |  |
|          | T | 60  | 50  | 24  | 28  | 9   | 98  | 35  |  |  |  |  | 14 | 39 | 11 | 25 | T |  |

Sfig. 1

Nucleotides frequencies obtained at each randomized position of selected plasmids and in the initial pool corresponding to the distal 5'-exon (positions -20 to -14) and distal 3'-exon (positions +2 to +5)

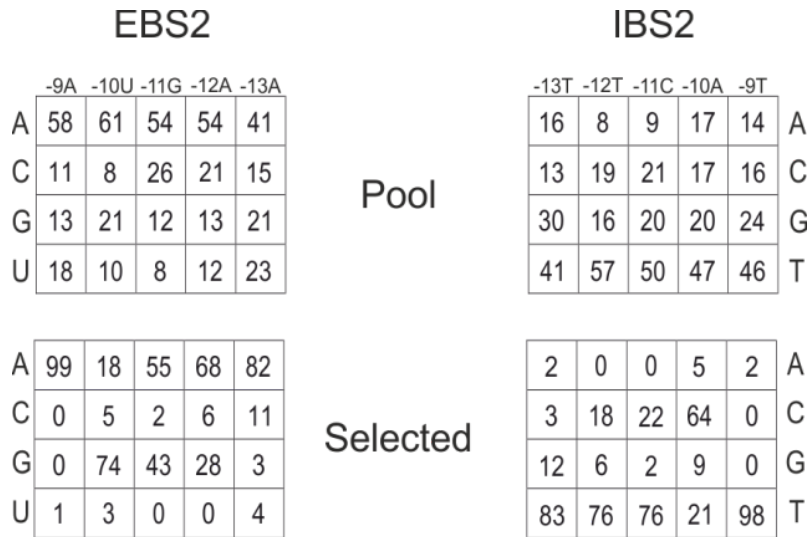

Sfig. 2

Nucleotides frequencies obtained at each randomized position of selected plasmid and in the initial pool.

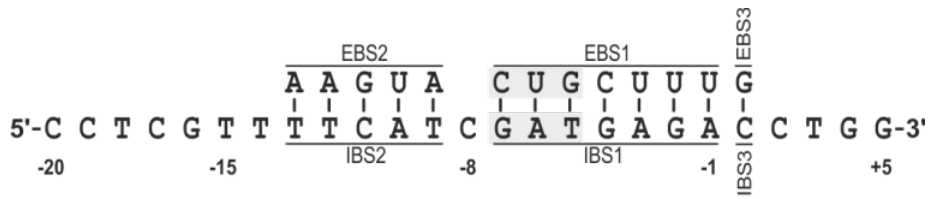

|                 |     |     |             |          |     |     |     |   |
|-----------------|-----|-----|-------------|----------|-----|-----|-----|---|
| <b>EBS1</b>     |     |     | <b>IBS1</b> |          |     |     |     |   |
|                 | -5G | -6U | -7C         |          | -7G | -6A | -5T |   |
| A               | 36  | 43  | 33          | Pool     | 21  | 30  | 19  | A |
| C               | 20  | 19  | 22          |          | 18  | 11  | 11  | C |
| G               | 20  | 12  | 20          |          | 32  | 23  | 30  | G |
| U               | 24  | 26  | 25          |          | 30  | 37  | 40  | T |
| <b>Selected</b> |     |     |             |          |     |     |     |   |
| A               | 12  | 32  | 11          | Selected | 7   | 16  | 7   | A |
| C               | 45  | 39  | 39          |          | 7   | 12  | 9   | C |
| G               | 32  | 12  | 4           |          | 75  | 41  | 47  | G |
| U               | 12  | 17  | 46          |          | 12  | 32  | 37  | T |

**Sfig. 3**

Nucleotides frequencies obtained at each randomized position of intron-invaded plasmids (selected) and in the original pool corresponding to the EBS1-3'/IBS1-5' interaction whose nucleotides are highlighted in grey.

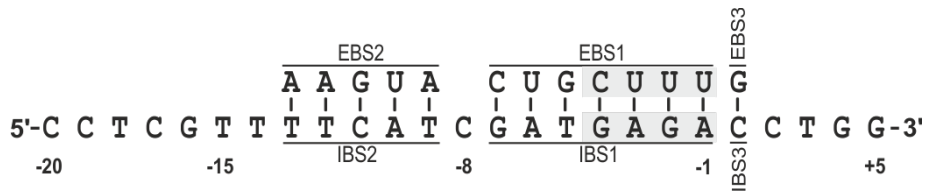

| EBS1     |     |     |     |     | IBS1 |     |     |     |     |   |
|----------|-----|-----|-----|-----|------|-----|-----|-----|-----|---|
|          | -1U | -2U | -3U | -4C |      | -4G | -3A | -2G | -1A |   |
| A        | 23  | 22  | 24  | 22  | Pool | 27  | 19  | 30  | 23  | A |
| C        | 23  | 11  | 13  | 22  |      | 29  | 24  | 31  | 30  | C |
| G        | 26  | 29  | 22  | 29  |      | 11  | 31  | 17  | 21  | G |
| U        | 29  | 38  | 41  | 28  |      | 33  | 26  | 21  | 26  | T |
| Selected |     |     |     |     |      |     |     |     |     |   |
| A        | 8   | 9   | 12  | 14  | 23   | 25  | 36  | 33  | A   |   |
| C        | 28  | 8   | 2   | 16  | 17   | 42  | 20  | 10  | C   |   |
| G        | 27  | 44  | 55  | 29  | 29   | 7   | 13  | 32  | G   |   |
| U        | 37  | 39  | 31  | 41  | 31   | 26  | 31  | 25  | T   |   |

Sfig. 4

Nucleotides frequencies obtained at each randomized position of intron-invaded plasmids (selected) and in the original pool, corresponding to the EBS1-5'/IBS1-3' interaction whose nucleotides are highlighted in grey.

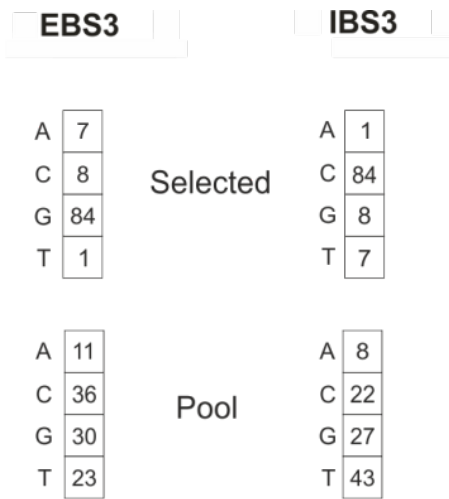

**Sfig. 5**

Nucleotides frequencies obtained at each randomized position of intron-invaded plasmids (selected) and in the original pool, corresponding to EBS3/IBS3 interaction.

**Supplemental Table1.** Oligonucleotides used.

| Oligonucleotide  | Sequence 5' to 3'                                       |
|------------------|---------------------------------------------------------|
| 18R0             | ACGTTTCTCAATTCGAAACG                                    |
| Epsilon          | GTGAGCGTCGGATGAAAC                                      |
| IBS1R-A1         | CATCTGCAGCCTCGTTTTTCATCGATNNNNCCTGGTCTAGACAT            |
| IBS1R-A1         | CATCTGCAGCCTCGTTTTTCATCGATNNNNCCTGGTCTAGACAT            |
| IBS1R-A2         | CATCTGCAGCCTCGTTTTTCATCENNNGAGACCTGGTCTAGACAT           |
| IBS1R-A2         | CATCTGCAGCCTCGTTTTTCATCENNNGAGACCTGGTCTAGACAT           |
| OLAL-A           | TAGGCCGGAGGAGTTTCACCAGCCG                               |
| RmInt1 IBS2-A    | CATCTGCAGCCTCGTTNNNNNCGATGAGACCTGGTCTAGACAT             |
| RmInt1 IBS2-A    | CATCTGCAGCCTCGTTNNNNNCGATGAGACCTGGTCTAGACAT             |
| RmInt1-3'N4      | TACAGATCTNNNGTCTCATCGATGAA                              |
| RmInt1-5'N7      | CATCTGCAGNNNNNNNTTCATCGATGAGAC                          |
| RmInt1-EBS1D-3'N | GTAAGTGTCGTCGAAACCAGGACCGTTTTCNNAATCCTGGGACAA           |
| RmInt1-EBS1D-5'N | GTAAGTGTCGTCGAAACCAGGACCGNNNNGTCATCCTGGGACAA            |
| RmInt1-EBS1-wt   | GTAAGTGTCGTCGAAACCAGGACCGTTTCGTCATCCTGGGACAA            |
| RmInt1-EBS2-N    | CTGGTTTCGACGACACTTACGNNNNNAACGACGCGTCCTC                |
| RmInt1-EBS2-wt   | CTGGTTTCGACGACACTTACGTTTATAACGACGCGTCCTC                |
| RmInt1-EBS3-N    | CCGGGCGGGCGGGCGACCGGCGTANAGGGGGCGTGAG                   |
| RmInt1-EBS3-wt   | CGCCGGTCGCCGCCCGCCCGG                                   |
| RmInt1-IBS1D-3N' | CTACTAGAGCTCACGTGCCTCGTTTTTCATCGATNNNNGTGTGCTGCAGAGGCA  |
| RmInt1-IBS1D-5'N | CTACTAGAGCTCACGTGCCTCGTTTTTCATCENNNGAGAGTGTGCTGCAGAGGCA |
| RmInt1-IBS2-Nsac | CTACTAGAGCTCACGTGCCTCGTTNNNNNCGATGAGAGTGTGCTGCAGAGGCA   |
| RmInt1-IBS3-A    | CATCTGCAGCCTCGTTTTTCATCGATGAGANCTGGTCTAGACAT            |
| RmInt1-IBS3-B    | ATGTCTAGACCA                                            |
| RmInt1-IBS3-N    | CTCCTAGGCCAGNGGTGAGTAGGCC                               |
| RmInt1IBS-B      | ATGTCTAGACCAGG                                          |
| Sac-Bbr          | GGGAGCTCACGTGCCTCGTTTTTCATCGATGAGA                      |
| 1ins-A           | CTGCAGGACCAGCGCTCCAGAAAGAT                              |
| 1ins-B           | CTGCAGTTGTTGCGGAACTTGGCGAT                              |
| 2ins-A           | CTGCAGCTCGCCGATGCTTTCATCGC                              |
| 2ins-B           | CTGCAGGGTCGGCAACATGCCGATTC                              |
| 3ins-A           | CTGCAGTTGAAGCCAAGCGCCGTGTC                              |
| 3ins-B           | CTGCAGAGCATCGTGTGCGAGAAGTG                              |
| 4ins-A           | CTGCAGCCCGGATAATCCACCTATG                               |
| 4ins-B           | CTGCAGCCAACGATAGCGCCGGTAAC                              |
| 5ins-A           | CTGCAGCGGCATACTGGACATGTGAG                              |
| 5ins-B           | CTGCAGTCCAGTCGGCGGAAATCGTG                              |
